# Supplementary material for: The role of atmospheric CO 2 in controlling sea surface temperature change during the Pliocene
Source: Copernicus journal article supplement (doi:10.5194/cp-20-1177-2024), 2024-05-17
Supplement: Supplementary file 1 [file cp-20-1177-2024-supplement.zip]

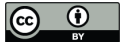

## *Supplement of*

# **The role of atmospheric CO<sub>2</sub> in controlling sea surface temperature change during the Pliocene**

**Lauren E. Burton et al.**

*Correspondence to:* Lauren E. Burton (eeleb@leeds.ac.uk)

- cp-20-1177-2024-supplement-title-page.pdf
- Supplementary.pdf
- data\_for\_Fig1.nc
- data\_for\_Fig2.nc
- data\_for\_Fig3.nc
- data\_for\_Fig3.txt
- data\_for\_Fig4\_FCO2\_values.txt
- data\_for\_Fig4\_data-model-agreement\_values.txt
- data\_for\_Fig5.txt
- data\_for\_Fig6a.txt
- data\_for\_Fig6b.txt
- data\_for\_Fig6c.txt
- data\_for\_Fig7.nc
- data\_for\_FigS1.nc
- data\_for\_FigS2.nc
- data\_for\_FigS2\_FCO2\_values.txt

The copyright of individual parts of the supplement might differ from the article licence.
